# Supplementary material for: Reduction- and thermo-sensitive core-cross-linked polypeptide hybrid micelles for triggered and intracellular drug release
Source: Royal Society of Chemistry journal article supplement (doi:10.1039/c6py01929c), 2017-01-01
Supplement: c6py01929c1.pdf [file c6py01929c1.pdf]

## Supporting Information

### Reduction-, Thermo-Sensitive and Core-Cross-Linked Polypeptide Hybrid Micelles for Triggered and Intracellular Drug Release

Yuanfeng Gao<sup>1</sup> and Chang-Ming Dong\*<sup>1,2</sup>

<sup>1</sup>Department of Polymer Science & Engineering, School of Chemistry & Chemical Engineering, Shanghai Jiao Tong University, Shanghai 200240, P. R. China.

<sup>2</sup>Shanghai Key Laboratory of Electrical Insulation and Thermal Aging, Shanghai Jiao Tong University, Shanghai 200240, P. R. China.

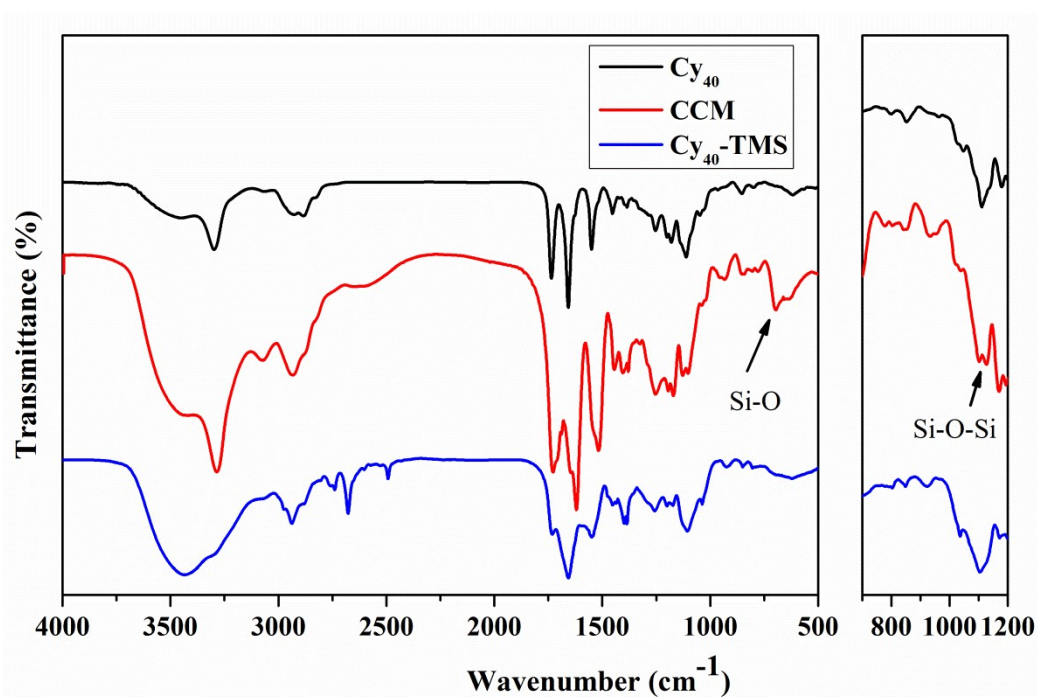

Fig. S1. FT-IR spectra of the polypeptides and the lyophilized CCMs.

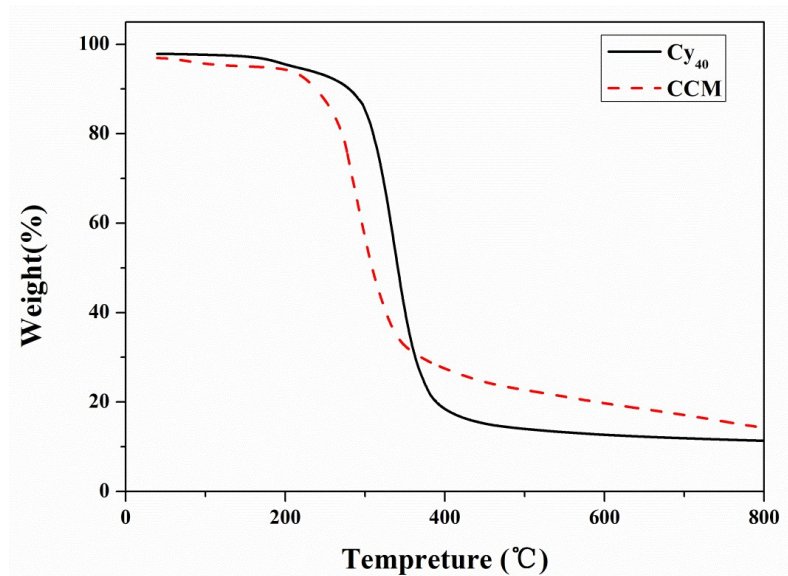

**Fig. S2.** TGA curves for Cy<sub>40</sub> and CCMs.

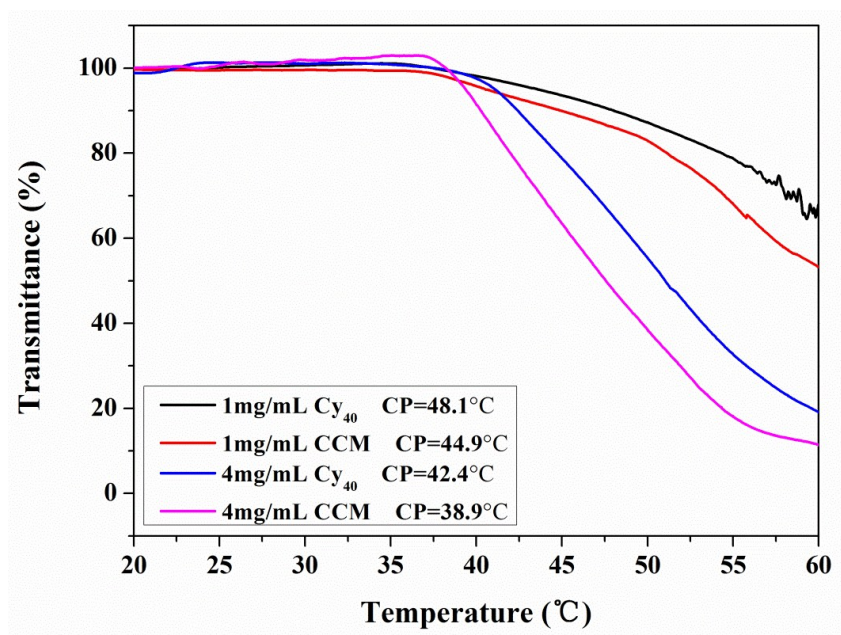

**Fig. S3.** The transmittance of Cy<sub>40</sub> or the CCMs as a function of temperature.

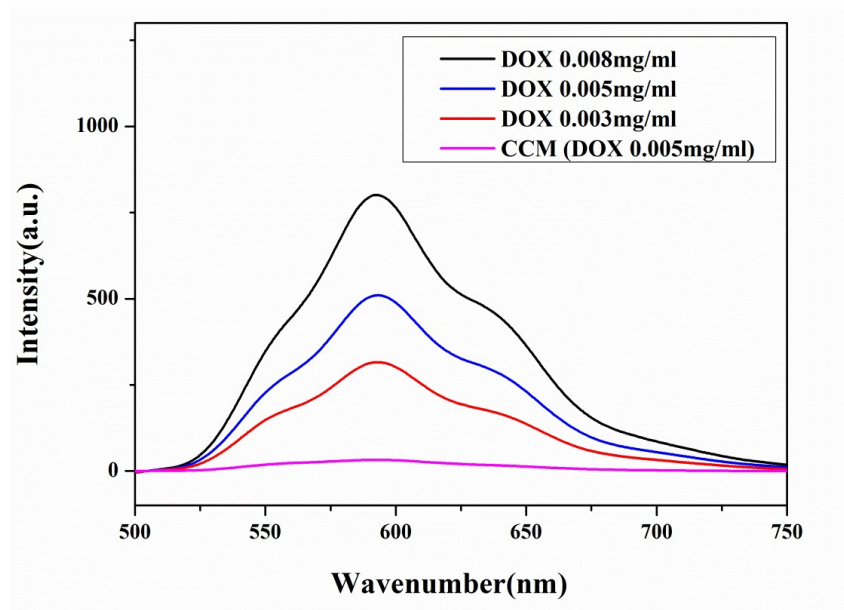

**Fig.S4.** Fluorescence spectra of DOX-loaded CCMs and free DOX in aqueous solution.

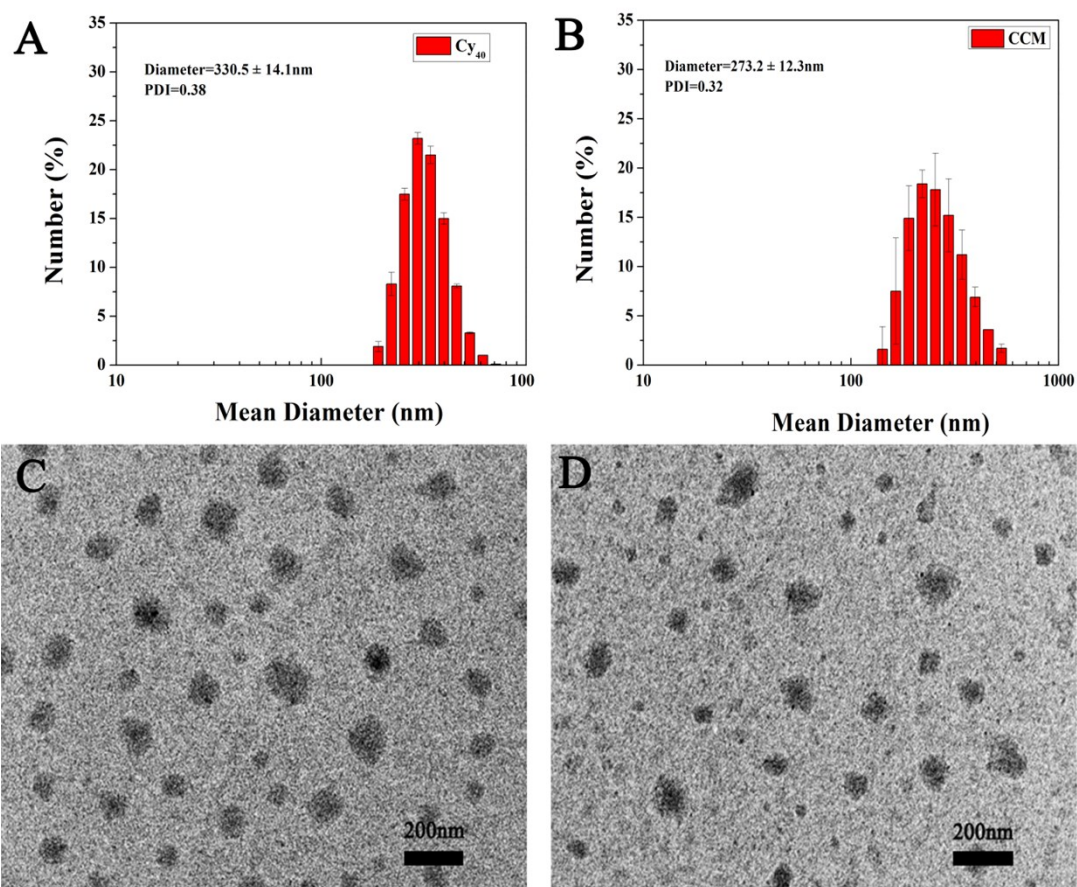

**Fig. S5.** DLS for DOX-loaded non-cross-linked micelles (A) and DOX-loaded CCMs (B); TEM of DOX-loaded non-cross-linked micelles (C) and DOX-loaded CCMs (D).

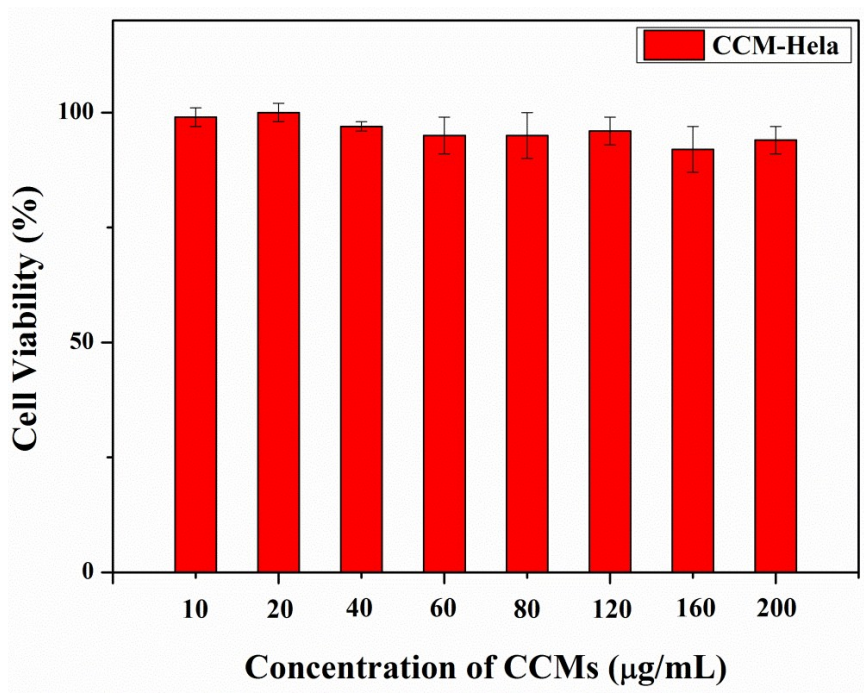

**Fig. S6.** Cytotoxicity of the CCMs with HeLa incubation for 48 h.

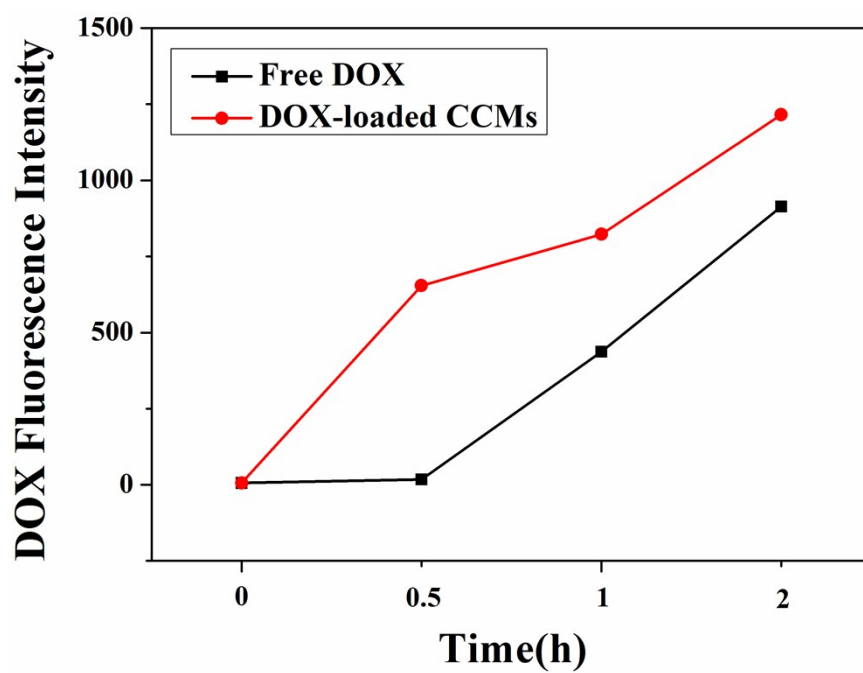

**Fig. S7.** The median fluorescence intensity of free DOX and DOX-loaded CCMs (DOX = 10 µg. mL<sup>-1</sup>) at different time intervals.



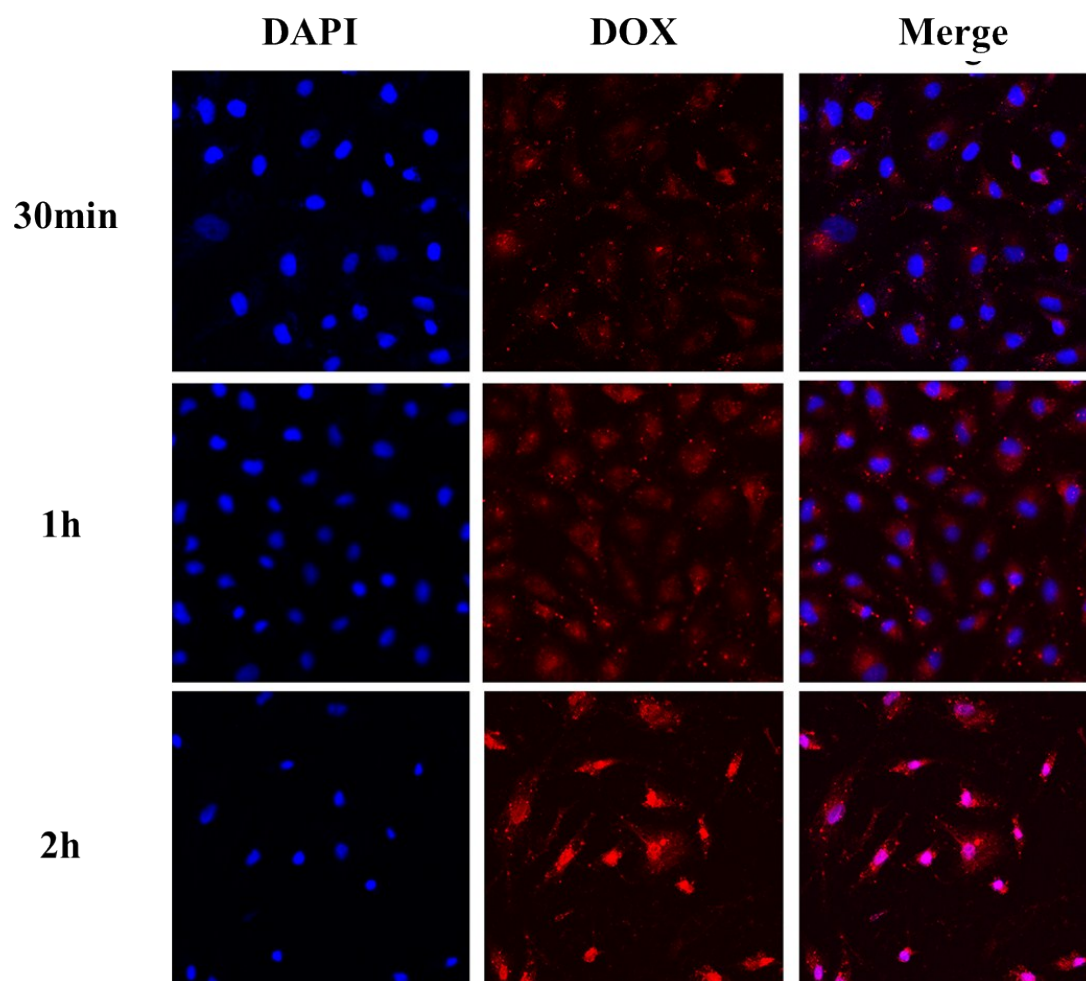

**Fig. S8.** CLSM images of the HeLa cells incubated with DOX-loaded CCMs at different time intervals.
